# Supplementary material
Source: PubMed Central journal article supplement (PMC3068194)
Supplement: NIHMS34236-supplement-1.pdf [file NIHMS34236-supplement-1.pdf]

## **Supplementary Information**

### **Mutations in the Pre-Replication Complex cause Meier-Gorlin syndrome**

Louise S. Bicknell, Ernie M.H.F. Bongers, Andrea Leitch, Stephen Brown, Jeroen Schoots, Margaret E. Harley, Salim Aftimos, Jumana Y. Al-Aama, Michael Bober, Paul A. J. Brown<sup>7</sup>, Hans van Bokhoven, John Dean, Alaa Y. Edrees, Murray Feingold, Alan Fryer, Lies H. Hoefsloot, Nikolaus Kau, Nine V.A.M. Knoers, James MacKenzie, John M. Opitz, Pierre Sarda, Alison Ross, I. Karen Temple, Annick Toutain, Carol A. Wise, Michael Wright, Andrew P. Jackson

## Supplementary Note

### The phenotype spectrum of Pre-Replication complex mutations

In this and the accompanying paper mutations are found in several patients from a cohort of microcephalic dwarfism patients and subsequently in many cases of Meier-Gorlin syndrome. Considering both papers together, almost all cases have primordial dwarfism with substantial prenatal and postnatal growth retardation evident. However, not all cases have microcephaly, and conversely microtia and absent/hypoplastic patella is absent in some. Therefore patients with pre-replication complex mutations do not all fit into either the general diagnostic category of microcephalic dwarfism or the current definition of Meier-Gorlin syndrome. However, all the patients could be encompassed by redefining MGS as a wider phenotype spectrum in light of the molecular genetics findings reported here.

### Are there genotype-phenotype correlations?

The large variation in phenotype associated with pre-replication complex mutations, also raises the question of phenotype-genotype correlations. Some preliminary observations may be made from the reported cases; however, further ascertainment of patients with preRC mutations will be necessary to substantiate these.

Compound heterozygous mutations appear to be associated with a more severe phenotype, particularly in the cases with *ORC1* mutations, when the presence of a frameshift mutation causes a severe developmental malformation syndrome. Similarly, a patient compound heterozygous for missense and null mutations in *ORC4* appears to be more severely affected: Patient P5, compound heterozygous for Y174C and A292fsX19 has absent patellae; while patients P6 and P7 with biallelic missense mutations (Y174C/Y174C) have patellae present, as well as milder growth impairment.

However other factors also appear to influence phenotype. For instance, case P18, with missense mutations in *CDC6* (T232R/T232R), has more severe growth impairment than some patients compound heterozygous for mutations in *CDT1*. This may imply that mutation of different genes contributes to variability. As well, it is possible that different genes result in different phenotypic manifestations. So far,

genu recurvatum and congenital emphysema have only been identified in *CDT1* and *ORC1* patients, while severe microcephaly ( $<-4$  SD) is predominantly observed in *ORC1* patients.

Alternatively, the precise site and nature of a substituted amino acid may explain variable severity and phenotype expressivity. However, as intrafamilial variability is also seen, (for example P9 has hypoplastic patellae, while patellae are absent in his siblings), genetic background or stochastic effects may contribute as well to phenotype variability.

Finally, as mutations have only been identified in 18 of 33 patients screened, the genetic basis of a substantial proportion of Meier-Gorlin syndrome cases remains to be determined.

# Supplementary Figure 1. Haplotype analysis of genes identified in MGS patients

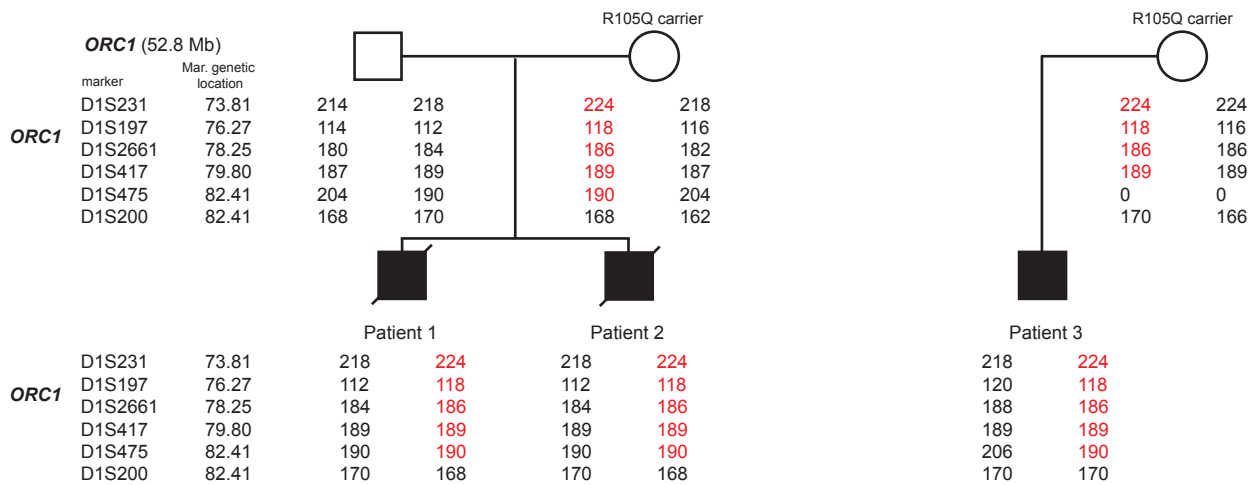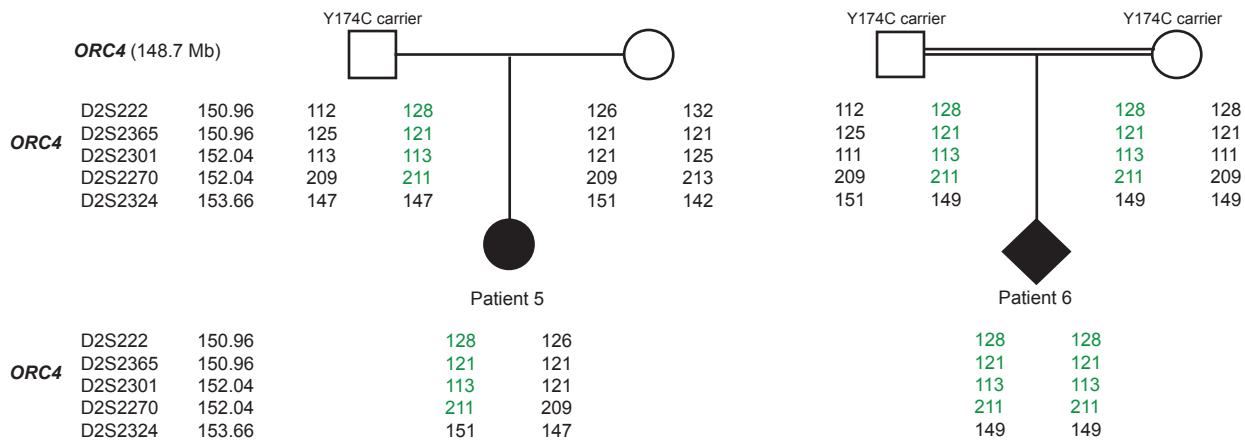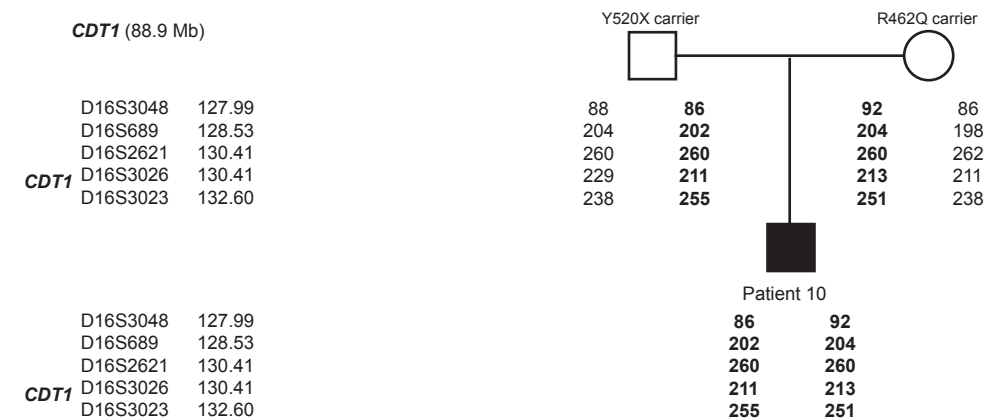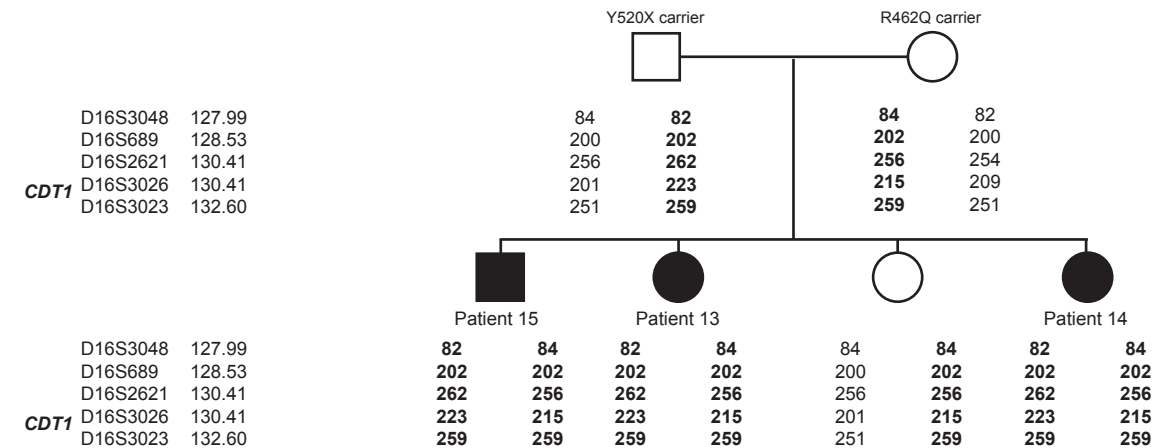

Supplementary Figure 1. **Haplotype analysis of genes identified in MGS patients.**

Chromosomal haplotypes of microsatellites flanking the genomic location of *ORC1*, *ORC4* and *CDT1* in different family members. For *ORC1*, a common founder haplotype for the mutation R105Q was identified in two MGS families (highlighted in red). Analysis of *ORC4* identified a common haplotype in two MGS families for the Y174C mutation (highlighted in green). Analysis of *CDT1* did not identify any common haplotypes (mutation haplotypes highlighted in bold).

**Supplementary Table 1.** Major clinical findings in 18 Meier-Gorlin syndrome patients with mutations in the pre-replication complex

**a. Anthropometric data**

| Patient                                    | P1          | P2          | P3 <sup>1</sup> | P4 <sup>2</sup> | P5          | P6(twin) <sup>2</sup> | P7(twin) <sup>2</sup> | P8 <sup>3</sup> | P9 <sup>3</sup> | P10 <sup>3</sup> | P11         | P12         | P13 <sup>4</sup> | P14 <sup>4</sup> | P15 <sup>4</sup> | P16         | P17         | P18 <sup>2</sup> | Total/range      |
|--------------------------------------------|-------------|-------------|-----------------|-----------------|-------------|-----------------------|-----------------------|-----------------|-----------------|------------------|-------------|-------------|------------------|------------------|------------------|-------------|-------------|------------------|------------------|
| Family                                     | F1          | F1          | F2              | F3              | F4          | F5                    | F5                    | F6              | F6              | F6               | F7          | F8          | F9               | F9               | F9               | F10         | F11         | F12              |                  |
| Gender                                     | M           | M           | M               | F               | F           | F                     | F                     | F               | M               | M                | M           | F           | F                | F                | M                | F           | F           | M                | 8M/10F           |
| <b>Mutations identified</b>                |             |             |                 |                 |             |                       |                       |                 |                 |                  |             |             |                  |                  |                  |             |             |                  |                  |
| Gene mutated                               | <i>ORC1</i> | <i>ORC1</i> | <i>ORC1</i>     | <i>ORC1</i>     | <i>ORC4</i> | <i>ORC4</i>           | <i>ORC4</i>           | <i>ORC6</i>     | <i>ORC6</i>     | <i>ORC6</i>      | <i>CDT1</i> | <i>CDT1</i> | <i>CDT1</i>      | <i>CDT1</i>      | <i>CDT1</i>      | <i>CDT1</i> | <i>CDT1</i> | <i>CDC6</i>      |                  |
| Amino acid alterations                     | R105Q       | R105Q       | R105Q           | R105Q           | Y174C       | Y174C                 | Y174C                 | F86X            | F86X            | F86X             | R462Q       | A66T        | R462Q            | R462Q            | R462Q            | R462Q       | Q361X       | T323R            |                  |
|                                            | V667fsX24   | V667fsX24   | SS              | SS              | A292fsX19   | Y174C                 | Y174C                 | Y232S           | Y232S           | Y232S            | Y520X       | SS/Q117H    | Y520X            | Y520X            | Y520X            | SS/Q117H    | R453W       | T323R            |                  |
| <b>Birth</b>                               |             |             |                 |                 |             |                       |                       |                 |                 |                  |             |             |                  |                  |                  |             |             |                  |                  |
| Gestational age (weeks)                    | 34          | 17          | 40              | 34              | 39          | 38                    | 38                    | 37              | 38              | u                | 41          | 37          | u                | u                | u                | 40          | 39          | 40               |                  |
| Birth length (cm)                          | 35          | 18          | 48              | u               | u           | 43                    | 43                    | 42              | 43              | u                | 41          | u           | 44               | 46               | 46               | u           | 50          | 42.5             |                  |
| Birth length SD <sup>5</sup>               | -7.6 SD     | NA          | -3.3 SD         |                 |             | NA                    | NA                    | -4.1 SD         | -4.5 SD         |                  | -6.9 SD     |             | <-2SD            | <-2 SD           | <-3.5 SD         |             | 0 SD        | -5.7 SD          | -7.6 to 0 SD     |
| Birth weight (kg)                          | 1.18        | 0.13        | <1.8            | 1.06            | 2.01        | 0.41                  | 0.45                  | 1.81            | 2.01            | u                | 2.20        | 1.80        | 1.87             | 1.86             | 2.33             | 2.64        | 3.25        | 2.26             |                  |
| Birth weight SD <sup>5</sup>               | -5.5 SD     | NA          | <-5.9 SD        | -5.9 SD         | -4.1 SD     | NA                    | NA                    | -3.8 SD         | -3.9 SD         |                  | -3.9 SD     | -3.8 SD     | <-2 SD           | <-2 SD           | <-3.8 SD         | -2.4 SD     | -0.3 SD     | -4.1 SD          | <-5.9 to -0.3 SD |
| Birth head circumference (cm)              | 27          | 14          | u               | u               | u           | u                     | u                     | 33              | 32              | u                | 33          | u           | u                | u                | u                | u           | 36.5        | 31               |                  |
| Birth head circumference SD <sup>5</sup>   | -3.6 SD     | NA          |                 |                 |             |                       |                       | -0.3 SD         | -2.1            |                  | -2.2 SD     |             | <-2 SD           | >-2 SD           |                  |             | +1.5 SD     | -3.7 SD          | -3.7 to +1.5 SD  |
| <b>Current</b>                             |             |             |                 |                 |             |                       |                       |                 |                 |                  |             |             |                  |                  |                  |             |             |                  |                  |
| Age                                        | 3m          | NA          | 47y             | 15y             | 23y         | 5y 3m                 | 5y 3m                 | 14y 6m          | 15y 5m          | 4y 6m            | 8y 3m       | 7y 2m       | 16y 9 m          | 14y 4 m          | 17y 6m           | 4y 4m       | 5y          | 7y 0m            |                  |
| Height (cm)                                | 42          | NA          | 132             | 123             | 127         | 94                    | 95                    | 143             | 154             | 94               | 104         | 100         | 137              | 139              | 166              | 93          | 108         | 103              |                  |
| Height for age SD <sup>6</sup>             | -9.6 SD     |             | -6.6 SD         | -6.9 SD         | -6.4 SD     | -4.2 SD               | -4.1 SD               | -3.3 SD         | -2.4 SD         | -3.2 SD          | -4.7 SD     | -5.1 SD     | -4.7 SD          | -3.9 SD          | -1.6 SD          | -3.3 SD     | -0.4 SD     | -4.1 SD          | -9.6 to -0.4 SD  |
| Weight (kg)                                | 2.01        | NA          | 72.1            | 18              | 23.6        | 11.3                  | 11.4                  | 48              | 34              | 14               | 12.6        | 11.6        | 31.1             | 28.8             | 49.9             | 10.3        | 15.5        | 11.9             |                  |
| Weight for age SD <sup>6</sup>             | -5.5 SD     |             | +0.8 SD         | -7.7 SD         | -5.6 SD     | -3.8 SD               | -3.8 SD               | -0.3 SD         | -3.1 SD         | -2.6 SD          | -9.9 SD     | -5.1 SD     | -5.5 SD          | -3.5 SD          | -2.0 SD          | -3.9 SD     | -1.4 SD     | -9.9 SD          | -9.9 to +0.8 SD  |
| Head circumference (cm)                    | 28.5        | NA          | u               | 45.6            | u           | 48.1                  | 47                    | 51.4            | 52              | 48.5             | 53          | 45.2        | 52               | 52.2             | 57.4             | 49.7        | 48          | 48               |                  |
| Head circumference for age SD <sup>6</sup> | -9.8 SD     |             |                 | -4.0 SD         |             | -2.1 SD               | -3.0 SD               | -1.6 SD         | -2.1 SD         | -2.3 SD          | +0.1 SD     | -5.0 SD     | -1.3 SD          | -1.0 SD          | +1.7 SD          | -0.5 SD     | -2.1 SD     | -3.3 SD          | -9.8 to +1.7 SD  |

GA, gestational age; NA, not available; SD, standard deviation; SS, splice-site mutation; T, too young to ascertain; u, unknown.

<sup>1-4</sup>; Patients previously reported (See supplementary references)

<sup>5,6</sup>; Growth references (See supplementary references)

**b. Clinical Features**

| Patient                        | P1                     | P2          | P3 <sup>1</sup> | P4 <sup>2</sup> | P5          | P6(twin) <sup>2</sup> | P7(twin) <sup>2</sup> | P8 <sup>3</sup> | P9 <sup>3</sup> | P10 <sup>3</sup> | P11         | P12         | P13 <sup>4</sup> | P14 <sup>4</sup> | P15 <sup>4</sup> | P16         | P17         | P18 <sup>2</sup> | Total  |
|--------------------------------|------------------------|-------------|-----------------|-----------------|-------------|-----------------------|-----------------------|-----------------|-----------------|------------------|-------------|-------------|------------------|------------------|------------------|-------------|-------------|------------------|--------|
| <b>Family</b>                  | F1                     | F1          | F2              | F3              | F4          | F5                    | F5                    | F6              | F6              | F6               | F7          | F8          | F9               | F9               | F9               | F10         | F11         | F12              |        |
| Gender                         | M                      | M           | M               | F               | F           | F                     | F                     | F               | M               | M                | M           | F           | F                | F                | M                | F           | F           | M                | 8M/10F |
| <b>Mutations identified</b>    |                        |             |                 |                 |             |                       |                       |                 |                 |                  |             |             |                  |                  |                  |             |             |                  |        |
| <b>Gene mutated</b>            | <i>ORC1</i>            | <i>ORC1</i> | <i>ORC1</i>     | <i>ORC1</i>     | <i>ORC4</i> | <i>ORC4</i>           | <i>ORC4</i>           | <i>ORC6</i>     | <i>ORC6</i>     | <i>ORC6</i>      | <i>CDT1</i> | <i>CDT1</i> | <i>CDT1</i>      | <i>CDT1</i>      | <i>CDT1</i>      | <i>CDT1</i> | <i>CDT1</i> | <i>CDC6</i>      |        |
| <b>Amino acid alterations</b>  | R105Q                  | R105Q       | R105Q           | R105Q           | Y174C       | Y174C                 | Y174C                 | F86X            | F86X            | F86X             | R462Q       | A66T        | R462Q            | R462Q            | R462Q            | R462Q       | Q361X       | T323R            |        |
|                                | V667fsX24              | V667fsX24   | SS              | SS              | A292fsX19   | Y174C                 | Y174C                 | Y232S           | Y232S           | Y232S            | Y520X       | SS/Q117H    | Y520X            | Y520X            | Y520X            | SS/Q117H    | R453W       | T323R            |        |
| <b>Neonatal problems</b>       |                        |             |                 |                 |             |                       |                       |                 |                 |                  |             |             |                  |                  |                  |             |             |                  |        |
| Congenital lung emphysema      | +                      | u           | +               | -               | -           | -                     | -                     | -               | -               | -                | +           | +           | -                | -                | -                | +           | +           | -                | 6/17   |
| Respiratory problems           | +                      | u           | +               | -               | +           | +                     | +                     | -               | +               | +                | +           | +           | -                | +                | -                | +           | +           | -                | 12/17  |
| Early feeding problems         | u                      | u           | +               | +               | +           | +                     | +                     | -               | u               | +                | u           | u           | +                | -                | -                | u           | +           | +                | 9/12   |
| <b>Craniofacial features</b>   |                        |             |                 |                 |             |                       |                       |                 |                 |                  |             |             |                  |                  |                  |             |             |                  |        |
| Microtia                       | +                      | +           | +               | +               | +           | +                     | +                     | +               | +               | +                | +           | +           | +                | +                | +                | +           | +           | +                | 18/18  |
| Low-set ears                   | +                      | +           | +               | +               | u           | -                     | -                     | -               | -               | -                | +           | +           | +                | +                | +                | +           | -           | +                | 11/17  |
| Abnormally formed ears         | +                      | +           | +               | +               | u           | +                     | +                     | +               | +               | -                | +           | -           | +                | +                | +                | +           | +           | +                | 15/17  |
| Small mouth                    | +                      | +           | +               | -               | u           | +                     | +                     | -               | -               | +                | +           | +           | -                | -                | -                | -           | -           | -                | 8/17   |
| Full lips                      | -                      | +           | +               | +               | u           | -                     | -                     | +               | +               | +                | +           | -           | +                | +                | +                | +           | +           | +                | 13/17  |
| Maxillary hypoplasia           | -                      | -           | -               | -               | u           | -                     | -                     | +               | +               | +                | +           | -           | +                | -                | -                | -           | +           | +                | 7/17   |
| Mandibular hypoplasia          | -                      | -           | +               | +               | u           | +                     | +                     | +               | +               | +                | +           | +           | +                | +                | +                | +           | -           | +                | 14/17  |
| <b>Skeletal anomalies</b>      |                        |             |                 |                 |             |                       |                       |                 |                 |                  |             |             |                  |                  |                  |             |             |                  |        |
| Absent patellae                | +                      | u           | +               | +               | +           | -                     | -                     | +               | -               | +                | +           | +           | +                | +                | +                | +           | +           | +                | 14/17  |
| Small patellae                 | -                      | u           | -               | -               | -           | -                     | -                     | -               | +               | -                | -           | -           | -                | -                | -                | -           | -           | -                | 1/17   |
| Delayed bone age               | u                      | u           | +               | +               | u           | +                     | +                     | +               | +               | -                | u           | u           | +                | -                | u                | u           | +           | +                | 9/11   |
| Slender long bones             | +                      | u           | +               | +               | u           | +                     | +                     | u               | +               | u                | +           | u           | +                | +                | +                | -           | -           | +                | 11/13  |
| Genu recurvatum                | +                      | +           | +               | -               | -           | -                     | -                     | -               | -               | -                | -           | +           | u                | u                | u                | +           | -           | -                | 5/15   |
| <b>Genitourinary anomalies</b> |                        |             |                 |                 |             |                       |                       |                 |                 |                  |             |             |                  |                  |                  |             |             |                  |        |
| Cryptorchidism                 | +                      | -           | +               | NA              | NA          | NA                    | NA                    | NA              | +               | +                | +           | NA          | NA               | NA               | -                | NA          | NA          | +                | 6/8    |
| Micropenis                     | +                      | -           | -               | NA              | NA          | NA                    | NA                    | NA              | -               | -                | -           | NA          | NA               | NA               | -                | NA          | NA          | +                | 2/8    |
| <b>Mammary glands</b>          |                        |             |                 |                 |             |                       |                       |                 |                 |                  |             |             |                  |                  |                  |             |             |                  |        |
| Hypoplasia                     | NA                     | NA          | NA              | +               | +           | T                     | T                     | +               | NA              | NA               | NA          | T           | +                | +                | NA               | T           | T           | NA               | 5/5    |
| <b>Development</b>             |                        |             |                 |                 |             |                       |                       |                 |                 |                  |             |             |                  |                  |                  |             |             |                  |        |
| Mental retardation             | T                      | T           | mild            | -               | -           | -                     | -                     | -               | -               | -                | -           | -           | -                | -                | -                | -           | -           | -                | 1/11   |
| <b>Deceased</b>                | 3.5 months 17 weeks GA |             |                 |                 |             |                       |                       |                 |                 |                  |             |             |                  |                  |                  |             |             |                  | 2/18   |

GA, gestational age; NA, not available; SD, standard deviation; SS, splice site mutation; T, too young to ascertain; u, unknown.

<sup>1-4</sup>; Patients previously reported (See supplementary references)

<sup>5,6</sup>; Growth references (See supplementary references)

**Supplementary Table 2.** Primer sequences used for sequencing of genes.

|             |                           |               |                             |
|-------------|---------------------------|---------------|-----------------------------|
| ORC1-ex2F   | TCATTTGAAGGGAGGGACTG      | ORC4-ex2F     | TGAAGCCATCGAAGATTTTG        |
| ORC1-ex2R   | GAACAGGCTAGATACAAGTTGACTG | ORC4-ex2R     | TGTGCTGGCATCTCGTTAAG        |
| ORC1-ex3F   | GGATCTGAAGAGCTTGACCC      | ORC4-ex3F     | TGTGCTGGCATCTCGTTAAG        |
| ORC1-ex3R   | ATCCACAATCTCCACCTC        | ORC4-ex3R     | CAAAACCTGGAAGGCATCTG        |
| ORC1-ex4F   | GAATTGCTCAGTAAAGTGCTTTG   | ORC4-ex4F     | GCTAGGCCAAGTACCCAGAG        |
| ORC1-ex4R   | CATGAAGTTCAGGAGGCAGAC     | ORC4-ex4R     | CACTAGGAGGACAAATAAGGGG      |
| ORC1-ex5F   | TACTCCTGGCTCTTTGGG        | ORC4-ex5F     | AATTTGAAAACCTACTTGTAAAGAGG  |
| ORC1-ex5R   | TTTTATCACATAACCCTTTAGCCC  | ORC4-ex5R     | TGGTGTGCTAAGTAAACATGG       |
| ORC1-ex6F   | TGTGATGAGATTGTGGGTTTG     | ORC4-ex6F     | AACTGGAACAACCTGCTG          |
| ORC1-ex6R   | TTTGACTATGACTCACATACTTACG | ORC4-ex6R     | GAATTTCTGAACCTCTCCCTACC     |
| ORC1-ex7F   | AGACTGGGAGCCAATCAGG       | ORC4-ex7F     | TTTGAGAATCAGACAGCCATC       |
| ORC1-ex7R   | CAATGGATTGGCAAATAAACAG    | ORC4-ex7R     | TTTGGCAAAGCTGTATTACC        |
| ORC1-ex8F   | CAGGAGGGACCCTGCAATAC      | ORC4-ex8F     | CCAAAGTAGGCTATCAGAATGTTTAC  |
| ORC1-ex8R   | TGTCCTCAGATTCAGCTGTTAC    | ORC4-ex8R     | AACTAGCAGTGCAGCAATTAAGC     |
| ORC1-ex9F   | ACATTTGCTGGTGTCTCTG       | ORC4-ex9F     | AGCAAATGCCTGGAGGTG          |
| ORC1-ex9R   | GTGAATGAAAGCAGAGGCC       | ORC4-ex9R     | TCCTTCAGCAATATTAGAAACTTTG   |
| ORC1-ex10F  | TGAGTAGATGGTTGGGGAATG     | ORC4-ex10F    | ACCAACCAGTAAGGCACAGG        |
| ORC1-ex10R  | TGAACTGTAACCCCAAGGC       | ORC4-ex10R    | AGTTCGCAACCAAGTCTGAGC       |
| ORC1-ex11-F | GTCTCGGTCTTCCCTCAG        | ORC4-ex11F    | TCAGAAGTTTTGCACAGTATCTCC    |
| ORC1-ex11R  | CATGAACATGCAATACACGC      | ORC4-ex11R    | GCATTATGCCACGTTAATTG        |
| ORC1-ex12F  | AAGCCAAGGGAGTAAGACC       | ORC4-ex12&13F | TGACCTTCTCACCCCTCAG         |
| ORC1-ex12R  | CTTGCTCTGAGGTACAGCC       | ORC4-ex12&13R | GGGCAGTATACTCCACAAAC        |
| ORC1-ex13F  | TGAAGCACCAGCTCAGTCTC      | ORC4-ex14F    | GCTTCCCAGTACTCTGTTCTGC      |
| ORC1-ex13R  | GCCACCACCTGGACC           | ORC4-ex14R    | GGACAATAGTTTTCCGTTCTCTAC    |
| ORC1-ex14F  | CCACCTGGATAATCACTGGG      | ORC6-ex1F     | CGTCTGTCTAACCAATCC          |
| ORC1-ex14R  | CCAGCAGGTAATCAGCAAAG      | ORC6-ex1R     | TGAAGTAGGCCCTAAACCCC        |
| ORC1-ex15F  | ATCTCTGGTCTTCTGGGC        | ORC6-ex2F     | CCAACGTGTTGAGCAAACCTC       |
| ORC1-ex15R  | TGCAGTTGAATGAGTAAAGC      | ORC6-ex2R     | CCAAAGTTAAAGAGCTTCAATG      |
| ORC1-ex16F  | TCTTTGGCTTCTCTGGG         | ORC6-ex3F     | TGAAGCTAAACCTTTAGGTAGAGTGAC |
| ORC1-ex16R  | CCATGTATTTAAAGCGTAAGTCC   | ORC6-ex3R     | CTGACCACATGATCCACCC         |
| ORC1-ex17AF | CCAAATGAAGAAAGAAAGGAACA   | ORC6-ex4F     | TGGTTGATACTTTCAGTCTCTTTTC   |
| ORC1-ex17AR | AGCCTGAGAAGTCAAGGCTG      | ORC6-ex4R     | TTAGAAGTATTCCTGGGGATG       |
| CDC6-ex2F   | TTTGGATGTGAAGCAAAGTG      | ORC6-ex5F     | TATCTGGTTGCCAGAGAAG         |
| CDC6-ex2R   | AAAGCTCCTCAAAGGACACAC     | ORC6-ex5R     | TTGACTTTTACAAGCAAAGGACTAC   |
| CDC6-ex3F   | AAGAGGCAGAGGTCTTGAC       | ORC6-ex6F     | CCAAAACATGCCCAAATACTG       |
| CDC6-ex3R   | TTTGGAGTCATCAGCCTGG       | ORC6-ex6R     | AGCACTGGGCTGTTCACTG         |
| CDC6-ex4F   | CTCCAAATGAAACCACCCAC      | ORC6-ex7F     | GCTGTTTCTCCATGTCATTTACG     |
| CDC6-ex4R   | CACCCAAGTATCATTTACCAAG    | ORC6-ex7R     | TAAACAAAATCCCAAAGCCG        |



|            |                            |             |                      |
|------------|----------------------------|-------------|----------------------|
| CDC6-ex5F  | GCTCTTCAAAGACATTTTAGGC     | CDT1-ex1F   | CCGCCTTCTCCCTTC      |
| CDC6-ex5R  | ATGGGCAACAGACCTTGC         | CDT1-ex1R   | CTCAGTTTCCCGAGCC     |
| CDC6-ex6F  | TCAGCTTTAGGAAAGTGACCTG     | CDT1-ex2-3F | TCCCAGTTAACTCAGAGCGG |
| CDC6-ex6R  | CGGCAGAAAGCTGGTTAAG        | CDT1-ex2-3R | CTCCCTGGAAGGAGCAGAC  |
| CDC6-ex7F  | GCTTTCAGAAGATTTAGTTTTCCC   | CDT1-ex4-5F | CTGCTGTGGCGTTGGAG    |
| CDC6-ex7R  | TTTCCTAGCACAGGTGATCC       | CDT1-ex4-5R | ACCCACCCTGGAAACTGTG  |
| CDC6-ex8F  | TTGGGACCTAAATTACAGAGGG     | CDT1-ex6F   | GACTGGTCACGGGTGGG    |
| CDC6-ex8R  | CAGAGCCTCTTAAGCCACATTC     | CDT1-ex6R   | GGTTAGGTGCTGAGGCAGTG |
| CDC6-ex9F  | CTGGTGGTTTGGTGTGTTG        | CDT1-ex7F   | CGTAAGCACAGGCCTACCTC |
| CDC6-ex9R  | TTCATCTTTCTACCTTTTCCTCAG   | CDT1-ex7R   | AAGCTCATCACCAAGGCTTC |
| CDC6-ex10F | TTGAATTTCCTTTAGCTCAAACCTAG | CDT1-ex8-9F | AGAGATACCGGGGACTCCTG |
| CDC6-ex10R | TGAAGTATCATAGGCCTTTTGG     | CDT1-ex8-9R | CTGCAGCACCAGGCAATTC  |
| CDC6-ex11F | TTTTGCAAACCCAGACTCAG       | CDT1-ex10F  | GTTTCAAGTGCTGCCCG    |
| CDC6-ex11R | AACGACTTGTTTAACTAACTGTGGTC | CDT1-ex10R  | AAAGAAAATGCTGGTGGGC  |
| CDC6-ex12F | CTGACAACCTTGCTTTTGTGAG     |             |                      |
| CDC6-ex12R | GCACTAAAATGAAGACTGTAGCTCTC |             |                      |

### Supplementary References

1. Gorlin, R.J., Cervenka, J., Moller, K., Horrobin, M. & Witkop, C.J., Jr. *Birth Defects Orig Artic Ser* **11**, 39-50 (1975).
2. Bongers, E.M. *et al.* *Am J Med Genet* **102**, 115-24 (2001).
3. Lacombe, D., Toutain, A., Gorlin, R.J., Oley, C.A., Battin, J. *Ann Genet* **37**, 184-91 (1994).
4. Feingold, M., *Am J Med Genet* **109**, 338 (2002).
5. Niklasson, A., Albertsson-Wikland, K. *BMC Pediatrics* 8:8 (2008).
6. Prader, A., Largo, R.H., Molinari, L., Issler, C. *Helv Paediatr Acta Suppl* **52**, 1-125 (1989).
